# Supplementary material for: Selective sensing characteristics of Fe doped and (Fe, N, O) co-doped molybdenum disulfide toward CO, CO2, and NH3 gases: a first-principles investigation
Source: Royal Society of Chemistry journal article supplement (doi:10.1039/d5ra09296e), 2026-04-13
Supplement: d5ra09296e1.pdf [file d5ra09296e1.pdf]

**Selective sensing characteristics of Fe doped and (Fe, N, O) co-doped  
molybdenum disulfide toward CO, CO<sub>2</sub>, and NH<sub>3</sub> gases: A first-principles  
investigation**

*Thi H. Ho<sup>1,2</sup>, Khiết An Vuong<sup>3</sup>, Lê Phương Truong<sup>4</sup>, Nguyễn Hải Đăng<sup>5</sup>, Minh-Thuan Pham<sup>6</sup>,  
D.M. Hoat<sup>7,8</sup>, Huỳnh Anh Huy<sup>9</sup>, Duy Khanh Nguyễn<sup>1,2,\*</sup>*

<sup>1</sup>Laboratory for Computational Physics, Institute for Computational Science and Artificial Intelligence, Van Lang University, Ho Chi Minh City, Vietnam; [thi.hohuynh@vlu.edu.vn](mailto:thi.hohuynh@vlu.edu.vn)

<sup>2</sup>Faculty of Mechanical, Electrical, and Computer Engineering, Van Lang School of Technology, Van Lang University, Ho Chi Minh City, Vietnam

<sup>3</sup>College of Natural Sciences, Can Tho University, Can Tho City, Vietnam

<sup>4</sup>Faculty of Mechatronics and Electronics, Lạc Hồng University, Dong Nai Province, Vietnam

<sup>5</sup>Faculty of Basic Sciences, Nam Can Tho University, Can Tho City, Viet Nam

<sup>6</sup>Center for Environmental Toxin and Emerging-Contaminant Research, Cheng Shiu University, Kaohsiung City, Taiwan

<sup>7</sup>Institute of Theoretical and Applied Research, Duy Tan University, Ha Noi 100000, Vietnam

<sup>8</sup>School of Engineering and Technology, Duy Tan University, Da Nang 550000, Vietnam

<sup>9</sup>School of Education, Can Tho University, Can Tho City, Vietnam

\*Corresponding authors: Duy Khanh Nguyễn ([khanh.nguyenduy@vlu.edu.vn](mailto:khanh.nguyenduy@vlu.edu.vn))

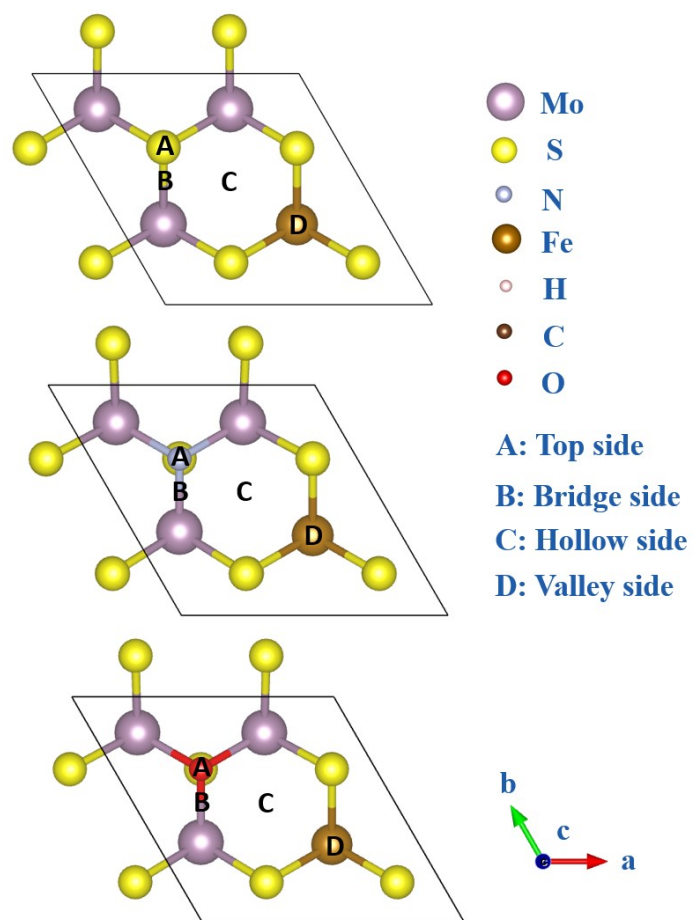

**Figure S1.** The 4 possible adsorption sites of CO, CO<sub>2</sub>, and NH<sub>3</sub> gases on the doped/co-doped MoS<sub>2</sub> systems are considered, including four positions: A (on top of S), B (Mo–S bridge), C (center of the MoS<sub>2</sub> hexagon), and D (on top of Mo).

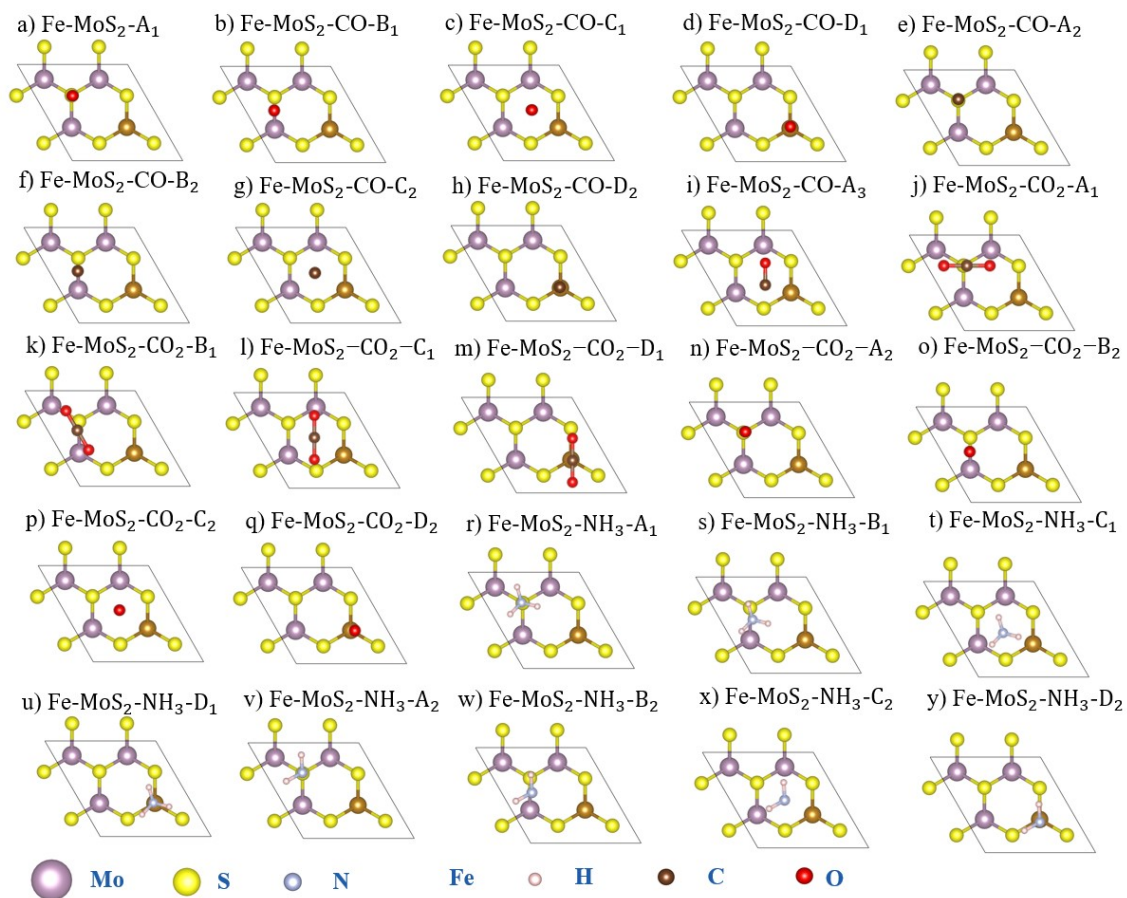

**Figure S2.** 25 possible (initial) adsorption configurations of the Fe-MoS<sub>2</sub> for CO (a-i), CO<sub>2</sub> (j-q), and NH<sub>3</sub> (r-y).

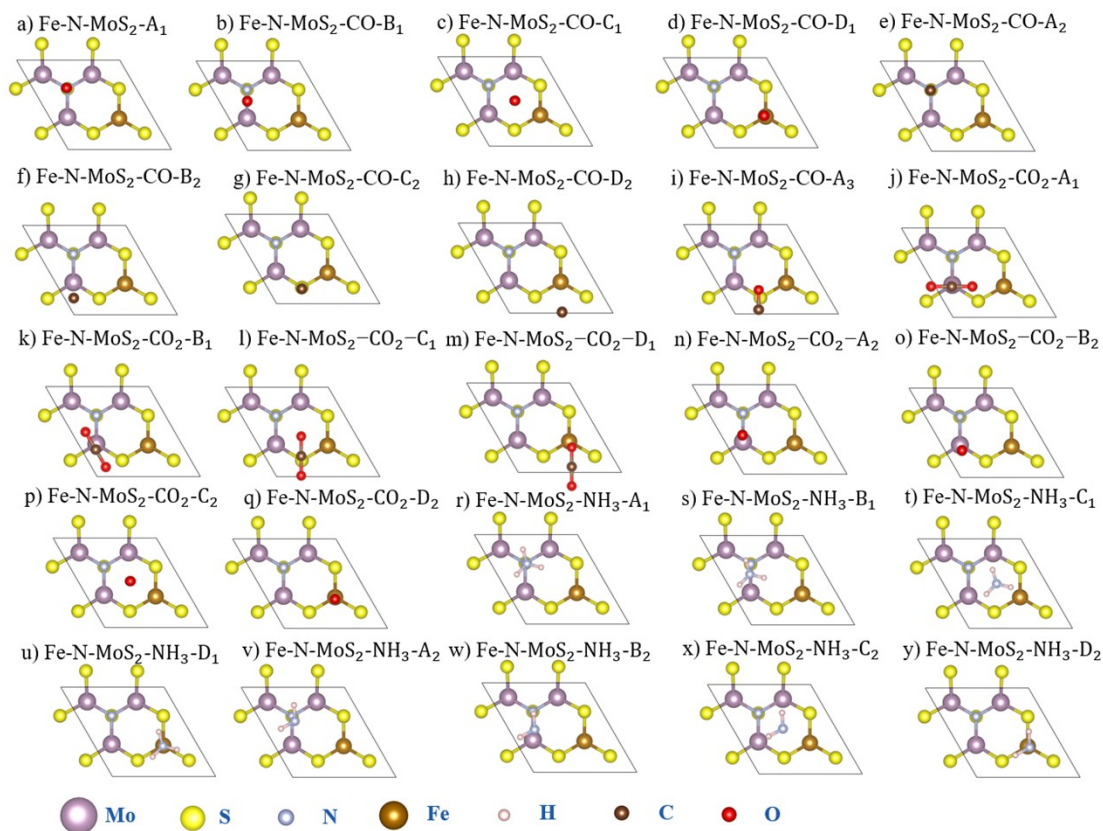

**Figure S3.** 25 possible (initial) adsorption configurations of Fe-N-MoS<sub>2</sub> for CO (a-i), CO<sub>2</sub> (j-q), and NH<sub>3</sub> (r-y).

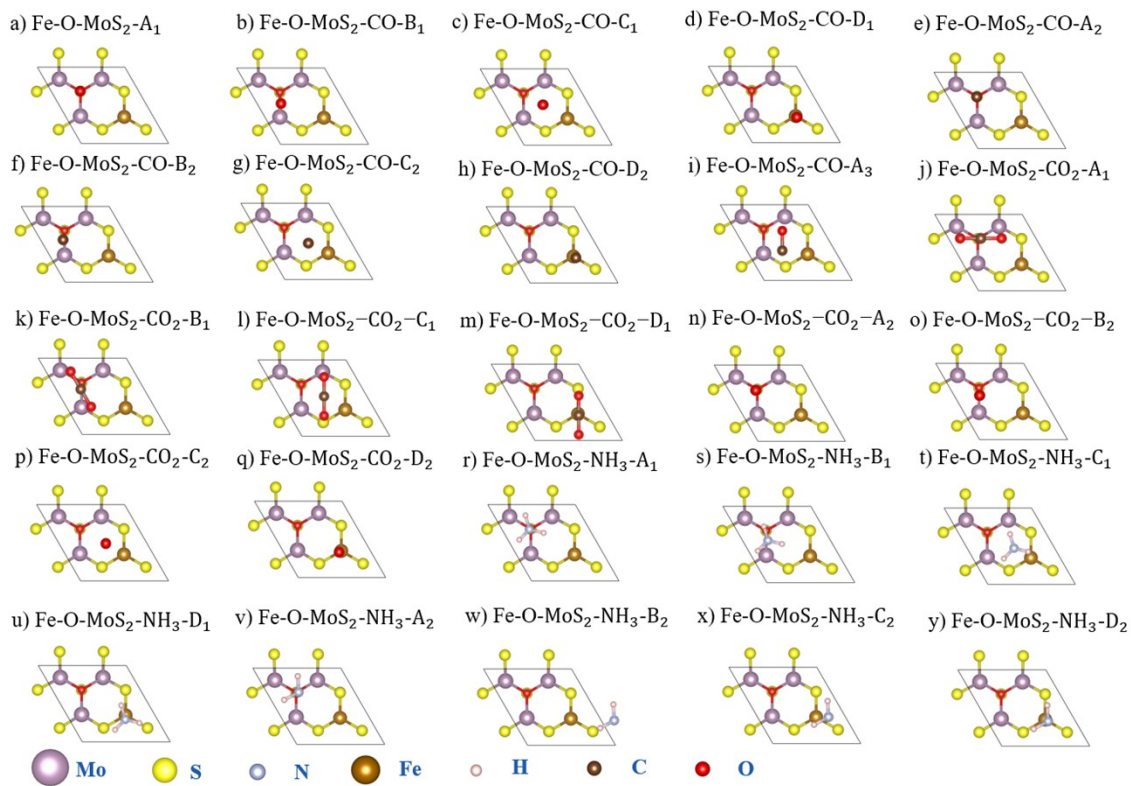

**Figure S4.** 25 possible (initial) adsorption configurations of Fe–O–MoS<sub>2</sub> for CO (a-i), CO<sub>2</sub> (j-q), and NH<sub>3</sub> (r-y).
